# Supplementary material
Source: publisher figshare collection journal article supplement (https://karger.figshare.com/articles/dataset/_/4265315)
Supplement: Supplementary file 1 [file 1]

**Table S1: Individual subject assessment data**

See excel data file
