# Supplementary material
Source: publisher figshare collection journal article supplement (https://karger.figshare.com/articles/dataset/_/4265315)

Figure S1: Visual characterization of insular anatomy by sex

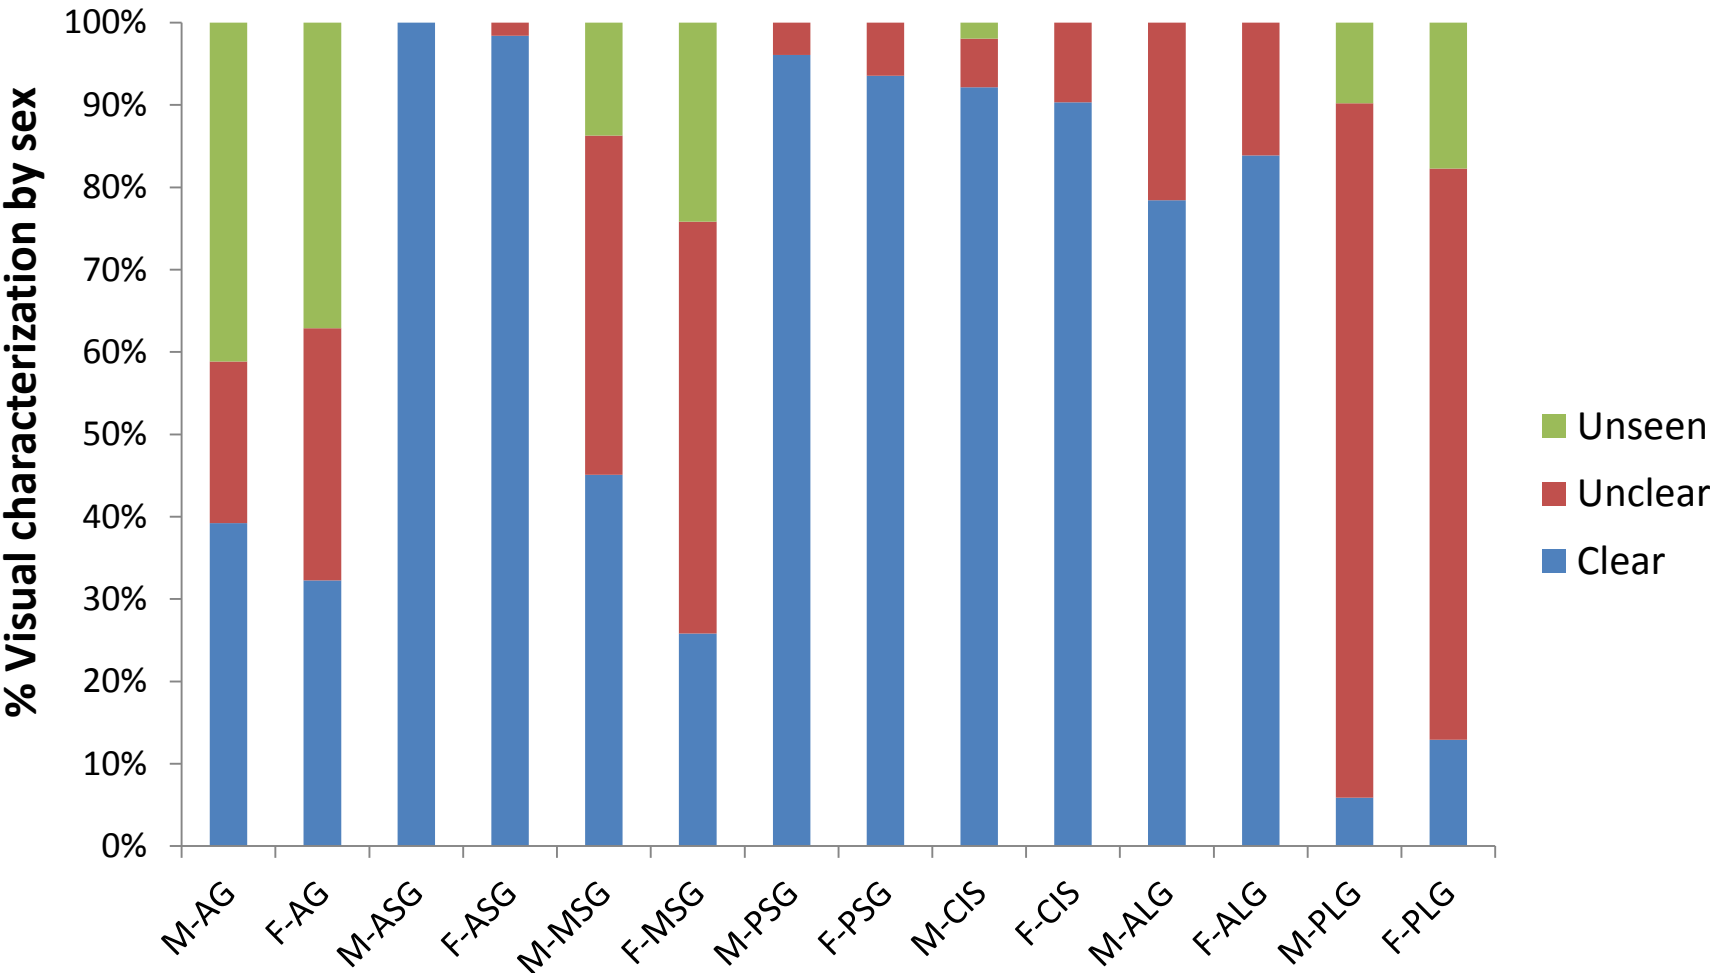

Supplement: Supplementary file 2 [file 1]
